# Supplementary material for: Sugar Transporters in Plasmodiophora brassicae: Genome-Wide Identification and Functional Verification
Source: MDPI journal article supplement (doi:10.3390/ijms23095264), 2022-05-09
Supplement: s1 [file s1]

**Table S2.** The quantitative real-time PCR primer for sugar transporter genes of *Plasmodiophora brassicae*

| Gene name | Forward primer         | Reverse primer         |
|-----------|------------------------|------------------------|
| PbHxt3    | GCCGTTGCCGTTTACTATTC   | CGCACTGAACTGGGATAGAT   |
| PQ-3      | GTTCTGCGGTATCCAGTTCAT  | GTGCTTGGCGAATAGGTAGAG  |
| PQ-4      | CTGTGACTACGAGAGCGATAAC | GGAATACGCGAGAAGAAGTACA |
| PQ-5      | GCTCGAATATGTCCCGTCAAT  | CAATGCTTGTTGCGGTAGTTG  |
| PQ-7      | CCAGCAAGTCGTCGTCAATTA  | GAAGATGGCGTAGAACAGGAAC |
| PQ-9      | CCTACGCCCAAACGATGATA   | GTACGACGACACGGAATAGTG  |
| PQ-12     | TCTTCGCTGTTGGCATGT     | ATACGGTCGTTGCCATGTAG   |
| PQ-13     | ACTTTGTCCTCGCATTCGT    | AGTCCTTCTTCGTGGTCTTTG  |
| Pbactin   | GGGACATCACCGACTACCTG   | ACTGCTCCGAGTTGGACATC   |
