# Supplementary material for: Sugar Transporters in Plasmodiophora brassicae: Genome-Wide Identification and Functional Verification
Source: MDPI journal article supplement (doi:10.3390/ijms23095264), 2022-05-09
Supplement: s1 [file s1]

**Table S1.** The primer of *Plasmodiophora brassicae* sugar transporters genes for constructing yeast functional complementation vectors

| Gene name | Forward primer                         | Reverse primer                           |
|-----------|----------------------------------------|------------------------------------------|
| PbHxt1    | ATACCCAGCCTCGAATGGCTACCTATCAGGGGATG    | GTCCAAAGCTGGATCTCAGGCTGAGGTCGTCGAC       |
| PbHxt2    | ATACCCAGCCTCGAATGGCTGTGCTCAGTGCG       | GTCCAAAGCTGGATCCTAGCGGGATTTATTCTCTGCATG  |
| PbHxt3    | ATACCCAGCCTCGAATGTCTGCCGAGGAGTCGC      | GTCCAAAGCTGGATCTTATTTCCACAATTCCTCGATCTGC |
| PbHxt4    | ATACCCAGCCTCGAATGACGGCCTCGTACGGG       | GTCCAAAGCTGGATCTCAGGCGACAACGTGCTCG       |
| PQ-1      | ATACCCAGCCTCGAATGACGTGCGTCTGTATTCC     | GTCCAAAGCTGGATCTCAAACAGCCGAGGAATGC       |
| PQ-2      | ATACCCAGCCTCGAATGATGGCGAATGGTCGA       | GTCCAAAGCTGGATCCTATTCTGGGGCGCCTTTCA      |
| PQ-3      | ATACCCAGCCTCGAATGTCGCCTGTGTCCTGC       | GTCCAAAGCTGGATCCTAGTATTGCGACTCCAGGTC     |
| PQ-4      | ATACCCAGCCTCGAATGATGCAATGTGTATGCAAGG   | GTCCAAAGCTGGATCTCATTGCTTCTCGATGTCCCTCG   |
| PQ-5      | ATACCCAGCCTCGAATGGCGTGGTGTGAATGCG      | GTCCAAAGCTGGATCTTACTTTGATTGCCGGTACATCC   |
| PQ-6      | ATACCCAGCCTCGAATGTCGTGCGACCTGCCG       | GTCCAAAGCTGGATCTTATCCCGACGGCATGGG        |
| PQ-7      | ATACCCAGCCTCGAATGGGGACCGCTCCGCGC       | GTCCAAAGCTGGATCTCAGATGGCGACCGGGAGG       |
| PQ-8      | ATACCCAGCCTCGAATGGAGAGAGCACATACGTATGGG | GTCCAAAGCTGGATCTTATACATCGGGTGTATCAGGTGCG |
| PQ-9      | ATACCCAGCCTCGAATGTCGGCCTCGCATGTG       | GTCCAAAGCTGGATCTCATGGATGCTTCGGCGC        |
| PQ-10     | ATACCCAGCCTCGAAAAGAGGAAAAAATTGTTAGGGGT | GTCCAAAGCTGGATCACTTTCACAAGTATATGCATCATCT |
| PQ-11     | ATACCCAGCCTCGAATGCCTCCGTATAACCGG       | GTCCAAAGCTGGATCTCATAGTGTAGGCGAAGGCG      |
| PQ-12     | ATACCCAGCCTCGAATGGACGCCGTCGTTGTCG      | GTCCAAAGCTGGATCAATGAAATCCTTGTGCGCTAGGC   |
| PQ-13     | ATACCCAGCCTCGAATGGACGTGTCGCGCACG       | GTCCAAAGCTGGATCCTAGTCCTTCTTCGTGGTCTTTGAC |
| PQ-14     | ATACCCAGCCTCGAATGGGGATCGCTCCGCGC       | GTCCAAAGCTGGATCTCAGATGGCGACCGGGAGG       |
