# Supplementary material for: Sugar Transporters in Plasmodiophora brassicae: Genome-Wide Identification and Functional Verification
Source: Int J Mol Sci. 2022 May 9;23(9):5264. doi: 10.3390/ijms23095264 (PMC9099952; doi:10.3390/ijms23095264)
Supplement: Supplementary file 1 [file ijms-23-05264-s001.zip]

Archive with 8 entries (8 files):
- Certificate of English Language Editing .pdf
- FigureS1.TIF
- FigureS2.tif
- Phylogenetic tree supplemental dataset.xlsx
- Plasmodiophora brassicaesugar transporter protein sequence.txt
- sugar content.xlsx
- Table S1.pdf
- Table S2.pdf
