# Supplementary material for: Sugar Transporters in Plasmodiophora brassicae: Genome-Wide Identification and Functional Verification
Source: Int J Mol Sci. 2022 May 9;23(9):5264. doi: 10.3390/ijms23095264 (PMC9099952; doi:10.3390/ijms23095264)
Supplement: Supplementary file 1 [file ijms-23-05264-s001.zip › Phylogenetic tree supplemental dataset.xlsx]

## Sheet: supplemental dataset
Description	Scientific Name	Max Score	Total Score	Query Cover	E value	Per. ident	Acc. Len	Accession
MFS transporter [Chloroflexi bacterium]	Chloroflexi bacterium	276	276	0.77	9e-84	40.51	442	RPJ49763.1
MFS transporter [Anaerolineae bacterium]	Anaerolineae bacterium	246	246	0.77	7e-72	40	440	MBI4926876.1
general substrate transporter [Blyttiomyces helicus]	Blyttiomyces helicus	368	368	0.91	1e-118	50.33	498	RKO83577.1
general substrate transporter [Caulochytrium protostelioides]	Caulochytrium protostelioides	340	340	0.91	5e-108	44.52	484	RKO97676.1
general substrate transporter [Catenaria anguillulae PL171]	Catenaria anguillulae PL171	315	315	0.91	5e-98	42.86	526	ORZ33341.1
Hexose transporter 2 [Hypsibius exemplaris]	Hypsibius exemplaris	309	309	0.91	7e-96	46.8	504	OQV25459.1
general substrate transporter [Rhizoclosmatium globosum]	Rhizoclosmatium globosum	289	289	0.86	2e-88	43.42	461	ORY42161.1
Sugar transporter family protein [Planoprotostelium fungivorum]	Planoprotostelium fungivorum	285	285	0.92	2e-86	40.08	528	PRP86522.1
sugar porter (SP) family MFS transporter [Allomyces macrogynus ATCC 38327]	Allomyces macrogynus ATCC 38327	281	281	0.91	6e-85	42.77	508	KNE65848.1
general substrate transporter [Gonapodya prolifera JEL478]	Gonapodya prolifera JEL478	273	273	0.91	2e-81	40.09	521	KXS18310.1
PQ loop repeat protein [Pelomyxa schiedti]	Pelomyxa schiedti	112	181	0.63	4e-24	41.13	366	KAH3767290.1
PQ-loop-domain-containing protein [Rhizoclosmatium globosum]	Rhizoclosmatium globosum	109	197	0.67	4e-23	43.38	331	ORY48163.1
PQ loop repeat-domain-containing protein [Leiotrametes lactinea]	Leiotrametes lactinea	122	122	0.78	3e-30	41.05	204	KAH9893501.1
lysosomal Cystine transporter [Spizellomyces punctatus DAOM BR117]	Spizellomyces punctatus DAOM BR117	150	150	0.92	4e-40	44.15	261	XP_016608459.1
PQ-loop-domain-containing protein [Ascodesmis nigricans]	Ascodesmis nigricans	137	137	0.88	7e-35	40.08	294	TGZ79921.1
cleft lip and palate transmembrane protein 1 homolog [Elaeis guineensis]	Elaeis guineensis	481	481	0.9	7e-160	44.89	602	XP_010912667.1
cleft lip and palate transmembrane protein 1 homolog [Phoenix dactylifera]	Phoenix dactylifera	481	481	0.9	1e-159	44.89	602	XP_008786461.2
Transmembrane protein [Handroanthus impetiginosus]	Handroanthus impetiginosus	466	466	0.9	4e-154	43.64	590	PIN15789.1
CLPTM1-like membrane protein cnrB [Arachis ipaensis]	Arachis ipaensis	464	464	0.89	3e-153	44.03	587	XP_016169702.1
