# Supplementary material for: Sugar Transporters in Plasmodiophora brassicae: Genome-Wide Identification and Functional Verification
Source: Int J Mol Sci. 2022 May 9;23(9):5264. doi: 10.3390/ijms23095264 (PMC9099952; doi:10.3390/ijms23095264)
Supplement: Supplementary file 1 [file ijms-23-05264-s001.zip › Plasmodiophora brassicaesugar transporter protein sequence.txt]

>PbHxt1
MATYQGMMTKKGVGATASKEDLDIGMSTSGEVVLTMTEALDRAGMGAFQKRIMAICGVCSAGDAMEALLLSFLLQDIKSEWNLEKGVDGLLGAVVFLGVFIGSLMSGLISDKFGRWYGFVITASMTTVFGLLSATAPSIT
MLCVWRFFVGVGLGGGHTSFTLFTEFLPSENRGKMLLLNQAFWSCGAVLEVVLAWNILPHYGWRTLLIVS
AVPGIVVLALSAWMPESPRYLAVQGRLTDARDLISRVSRVNGSSLHLQSWTLAPVPHSHHTTISEKVSVL
YSAALWPTTSRLWALWFSSSLLYYGVIFLSPRFFTNDTPQDYYISLLIASLAEFPALLVPYTVIDVWGRR
RTLATLYAVCAVACLVLTLQLRSTLDVAIVFMARGGVSAAFISLYVVTAESYPTSLRSTGFGVASCVARM
AGISTSFLSEDASVSLALMAFATTAAIASYVSMHLPNETANKALPSELATLPEALDSSGHGLLDDGERSG
SIPRTKVTRSTTSA
>PbHxt2
MAVLSAFRGSERAGNEFRGPTHTRLARTTAWGNAPDAVGLGHRPVRLAQQVGARLRSCCWRHVMFSEMDNAALGWFHLRAVLVTGAGFFTDAYDIFVISLVLPMVYKVYWPDLNFAREYPFYDGLLKASTMYGNFIGQLVFGYLGDRYGRKRMYGVELVIMIVCTIGSATSASSVRGANVLVYLALWRFFLGIGIGGDYPLSSIITSEFA
NVRHRGAMMAAVFALQGIGILVGGGVVLGLLAWFESSIRADPFTLDYVWRIALAFGIVPAMVAVYFRLTL
PESPRYTAHVQGDVDRAQADAARCIEMNSIGNDASEEDRVVNVEEVPVVPAGRWKDFVGHFGQWRYGKVLLGTAYSWFVLDIAFYGLSLNQSTILMAINYGGHTDVVYDQFYQNAVGAVLINLMGTVPGYWITVATIDRIGRKPIQHVGFVVIAICMAILAIYWNAMLANTSYFIPLYTIAQLFFNFGPNATTFVVPGEVFPTQWRSTGH
GISAACGKLGAVLGVQLVAPYFQDHAPVVLAVFAAAMLTGVASTLLLPETKGRSLEEICNGDGERKSTIV
RKPMRFKTAARRMPAKAAPDCGQCGNQARSDARFCDRCGAELSNGGGAPDTVVDLDSAPDAATRLQFAKRLPEVDMNIPFGRLREGKRTAKALAAFFKGRAALEVKFANDLRKLAATSLVINEPESKGLTDLIGRMTAAI
ELDVQFCTMYSQTITDDVLVALEQVRHLVKEQVATCTKQYTDARNTLRSAESNLAKVTEKLAKLEHQSEH
ETNSANAFLAARSAAKADSAKQAIPGVRKEQAQAQEAVVSSQQYLKAAQASVLDQLEDIEVQRMHRTLECLDKAMTLGVGLQRQKLAFEWDLARRLRSVSGPHDIESWVATVSKHARSPATNVDHQQEPKVEVDTCAMPAQDGGMEKAADSPATTSKPAVDVPKVTTVAPMEVDSDQPESAWAVPVESRVAWLPGDLPKQMAVSCPMLAINRDQASIMALCALDQLCQTPDLQKYCRSDLRILLGVREDHLLAAIDQYGQLFTSEYTSQTLLGYARDDFQAFLRGIFIVLGIHLTEDRCTADFRCSTAMIVSAAKSNVVDSDSIDVFLQSLDVPLGHLELPFQAQFAVFLYRRLLSAIVDKPNGDDDDDDDLDGNASSRAFDDWSTVLERIAQFKTANNVSDAVHAALLLEVIHTEILLD
IQNEMYPEEYPKVDLMSKVNDCTAAAIDHAVDCITASFDAAVPLAAAIKQQFRDWLCVLLDSNVLVDVRS
YRRVATLLARLDGGTETLRQCVARSARRAYADIRDRVASRTNAILDWNEFAPSLASEVTMLSTTQDPGID
TIRGIYRDVFRQALARDALWSAQASPSDWMEILSSMTVVDLDVKDVVESIGAVRLAGWVQQQREQVAGLVERMLLADRWTVADEKSGTSSSVVDVFSAMYGAMEALMATARKVGLDMPGRGGGSGSPAASEIVDLMNDYVDVYASSVVEAARPSPTALASKTGVVGRQTNSAHLIQVADHDHNKVRTRFGNMTKSLKSKLHAHTHSIDMSSSSSSPTSATSPPCETVAMPVAASSKSVDELAVRLCNCREALLRLTSLEYDLSERFSVDGSSMQRGREALGRQIAALQALIGERIVYHDLQATFDRLYNPAVSSATGFAAVMANQLDAIMSAAYAAVRDQHFPGEPSFPAIVHKVFAALMEALTWVTGHGAGGRCFADTDFMTFTEDIAAIQAMFGSELSEATAGALAKPFEERVQDLAQSSNEIAQRYSAGTCSKDDATIVLHRRTDPIAVAWVHAENKSR
>PbHxt3
MSAEESLLPTTTTTAASRADNRLPWVLTLSVGMGALLFGYHAGFSSPSEESVLEEVFEND
RQAADLAWSILNVGAMVGALLCGPIASRYGRRPAVLLNCVPYIAGAVLMVISRGGARAMF
TTGRLVAGAGVGYSSVIVPLYVAEIALPSLRGTLGCINQLNISGGVLVVSVLGLPIIAHA
WWWRIMMIVSLGFVVLQFLPMLLLAPESPVWLCSSGKTEQARASLRQLRGSKYAVEDELQ
ALVHHTEMDKANAGAESSSYVQLFSSQVRRPVVLGVLLMVLQQFSGINGVVFNMKSLFDN
GSSSASYVSMLGSILVNAVQVIATAGACTLMERVGRRTFLLSSCVGMALSCSVMAVAVYY
SLATYVKIFALCGYMIMFAFGVGPLPWLLCSEIYPSSVRAVAMSLSTVTNWACSFLVTLL
FDDMVLHIGQHGVFVFYAAVCLAGAVFFGATLPETRGLSLEQIEELWK
>PbHxt4
MTASYGYLLAFAAAMGGLLFGYEIGVVSQVLDMPGFRLYFGMADRLADGSLEAIKSADET
MRSLTTFSFLAGCFAGAWIVAYLADLFGRKRSILLGGGIFLIGAALQAFTWETTVYFAGR
ALAGVGVGILSMCSPLYISEAAPTEIRGRLVTVQQLMITLGICVAASINSILITTLQHTD
IDLEWRLAMGMQCVPALLLVLTMSVVPESPRWLAAKGRDGESLAVIARLRASTPDDLDAV
AAFDAIKADIVHEKAASWTELLAPGVRNRLGIVLGLQFWQQMTGINMILYYQGALITAMG
FDPAAAAIPFTLANDVMNFVSTFPGMYLIERMGRRRLLFLGGIGMAVAHFLVFLFVGVSQ
TQATPSLAWGAIASVYLFFFFFASTWGPVVWAYQSEVFPQQVRAKGTGAGAMANWAANAL
IGLVTPFISGAIGYRMYLIFAAAGLGMSAFTYCFVPETMGKTLEQMDDVFGTPKFSKTAA
PGPVVELEHVVA
>PQ-1
MTCVCIPQVVDGHQYSQWIGSLFGACAYSPMEKASYCIGAVSLVTWLIAMLPQIVEIYKAKSGSGISRVF
IGIWITGGCGMFLGGLLTHNPLPISLVGLYIVICNVIIFAQITYYDHVRRRPFAGFSPTKRSTVMVVALT
CTGTAALLATDAMVAPGSSSGRALLSSTNPVTCDYRPPMSDSVRTLGIILAWISGVLFFVSRVPQVLQNF
RDRCVRGLSLKMISLIIFGNSTLGLQLILGNKQGATEFVVKTLPFMLGSIGIVFWDVIILIQAAVYGRSM
ATKQRSKQQHSSAV
>PQ-2
MMANGRIFGSAREQHFGAASAIVDHRRYRAGPQSHPPGMRRIACVCDPAEVDGFASDPWIRSVFHDCVYT
PADYASFSLGWLSIVLFMVCTIPQIASNYRRKSVRGISRAFVVAWLLGDLFNVAGCILGHQLPTQTITGV
YFCVMDAVLLGQIAFYSRRPHCRRQPSHVEPLLPESSGDDASTATPSGNTKRVQMLAAPLLLVALVGGTA
GTYFVQQRQFVRQAPRQLLLLRGTGPACLYSDDLTSVEFIMGSIVSWASGLLYFLSRVPQVYHNIVTKTC
TGLSVTMFAMTVTSNIAYGASILLRFPPINGFFFAVTLPFLIGSVGTLVFDVIIVYQLTKFERRPE
>PQ-3
MSPVSCVCPDRPGASYSVFFGTVFGECLYTATDYIPVVAGMMSLVCWIFALLPQLLANYRNKQTEALSPI
FLAIWLAGDLCVFLGALVVESRATMVICGAYFCLNDICIVSQKFIYRKRPDGASATKGKVPAAIALAACT
LLLCGSMAIPVAPSAELGGRTLLNVDSPRLCNAKTDNATRIVLGSIIAWFSGLLYFCSRIPQIVHMIRMK
NLDGLEVSMFSLAVAGNTFCGIQFISDAAINGIPSVSRWCADTLPFIIGSSGTLVFDVIILYLFAKHGRA
TKVSKSDLESQY
>PQ-4
MMQCVCKDAQRGGWYYNQFVGTVFSECLYYPVDYIPLVCGLISTVLWMFALMPQIITNYKNKQTEALSPV
FVVVWLAGDVFTLAGAVISQQPMTMILCGAYFCLNDVFMLSQSYIYRNNSSGGRRSSRSKSVATLCAVAL
MVGGTIAATSTSMSPSVTGRTLLSENTNYCDYESDNEIRFILGSVISWIAGMLYFFSRIPQIRHMVSSRS
VEGLDVRMFILCVAANTFGGAQFIAKAALSNDFNVQKWCANTLPFVIGSTGTLVFDFIIITIYFRYGRLP
TRDIEKQ
>PQ-5
MAWCECEPIYKNGYRYSQFMGTVFGECVYTPLEYVPSMLGVLSILAWMTAGLPQYWRNYRNKHCESLSAA
FIVVRAVADISNFISSVLLQQPLTMVVLGGYFLFDDAVMLSQMYYYNRVYPKRYGARTSATRKAAVALFG
VALFTTGTLSSFTSTTVPSSGASRTLLQDNKMLCVPEENLAFWVTTTGTVLAWLGNALFFFARIPQVVKN
YQEKRCDDLSPAMFMLFVAANTTYGLRIIVDAVIEQAAPVVTDNFWAEFCVKKLPYLLGSIGTLAFDVLI
IVQSRMYRQSK
>PQ-6
MSCDLPPSFPVLETVVGLVGTVFWSFQLVPQALETYRNKTAQGVSQGMLTLWYMSGLVYFVFAILIGLAW
PLKTQPVLFSVFSLVCILQALYYGRTDALPADKRRARLSALVGVAAVLASAAVVTLATYFIDAARRSGVT
WPVNVPGYTSTALIFIGFVPQYWEIYQTRRVIGLSITFLAFDILGGVLSTISLCFRCPPFEALAASTYLM
VVVCDLLLVILYYVLERFWKSTAVSNDPMPSG
>PQ-7
MGTAPRHLVLASRALGWGYFLAWSLSFYQQVVVNYRLRRTPLTGLSPHFLAYNFTGFLFYAIFVTATYAV
QKRDGAAVSVDPNDIAFAVHALVITAVTMAQYVAYGGARALSYRPAPPLAWLHTYVLAALWTLAGLCVAL
AATRLIPWIASDSPSYRFSVVTYLGSAKIFITTLKYVPQAVHNASRRSTVGWSIGNILLDLLGGLMSLAQ
QALDAVIQGTADVFTGNVPKLLLALLSISFDIVFIVQHYVLYRGLPGDEHAPLLHTRPSGDLPVAI

>PQ-8
MERAHTYGTEGPVEVVISGLGWASFALAIYAAVPPIVSNWRSKSTSLNGAFLMLWSLADAMLFIGAVLVN
APLTHRVICLTLCTKSIILFAQYVIYGRRRTASHVYSPISRKQARSAIQLAAVTLVSTLPLTSGTLHRTA
DVLSGSSRSLLGVATPHDVVVIPSGRVMLGTVILVIACVLLIASRIPNVMHAYSTKASGIVVDDGAEGPV
RMIVVTCFSNAALVVQHTLMIEKHGLHRELVPLLASSCGVLLLDMLYLHWSRATPKVSSRTNELKPIITA
PDTPDV
>PQ-9
MSASHVITDVGVVGGAPGYLKAICAMASMMTTLSPSSVLLRMLRRKRDTGEIAWITLWTSALAQTLWVTY
YFLRPNDDTVALWLSVFGAVTFFGYLFVHYSVSSYRDRPQRRRMLYYLLVTIVLWGTAFTTIVPKKRRAD
YAGVVCNIVNLIMLMAPLSTLGEVFRTQSARTIPSLPALASTFGAACWLLWGYLDNDIFVCVPSVIALLL
GSVQLSLIGFYGSGAPKHP
>PQ-10
MAQVIEAAGPAGGAAAPAADAQQRTTLMGTLTSAVRMVVIYSLISYFSRSMFGGGNVSRSPDGTVRPAHNNLWPAETPFRLTVHISERDHGPLSPDDILDTWRVPHALTYDWATDKVLSRHINLTLSEAVQHNASVYAHI
QFQPETGAPAFTLTHRINVYRPRPKLNTKMNLVSGVFSDPGLDEARKSGIESVSTYKTLRDQDTSWQSVW
RPLLHIRIVTDQTVFPNNAIPQQVRAAYTIDPKTNGYLPPVYLDYFWLLSDQCTVINDTVKEVPLEMQFS
PISLLRWQLQSQMDASFKQQESFGSSAEEVEGVRRMLMETNPVLLVVTFLVSMLHMVFDVLAFKNDIQFW
QQDNKSLEGLSIRTILINSFCQLIIFLYLLDNETSWMVLGSAGVGVLIEFWKVTKTLDIKVEKVEGRMFP
HVTFNDKASYTETATAEHERVAIKYLSWVLYPLAVGYALYSLVYNEHKSTYSWILGSATSFVYMFGFILM
CPQLYLNYKLKSVAHLPWRMLTYKALNTFIDDLFAFIIKMPMMHRLSCLRDDIVFFIYLYQRWIYRVDYT
RTNEYGLKPSDSDDHKKTDGDKAEPAPAEPPKQKEVLHEGLTRRSKK
>PQ-11
MPPYNRFIYAVLGEKSTSAMMDVSVYFMMMSCVLTIVKCVPPLYKNCRERSTRSIDPRMVALWVAADALC
LVSCLVKRSNMAMTALAVILVVQDCLLGAQLAYFTYVRRPPGASKAKGTRLSLKGALRPVALLSCVLVTA
GSPLYASFSWSPSSSPSRALLSADAVTVATWRLTLGTILMAVSAALSISSRMPTLVTNFKTRVAPPVSFL
MYVLLVLTNACFAVHVLLKSLCDGWTSHDVPAYCVSFGCCILDAIVVFQLATYRQAASRDIENGQSGIHR
QTSWSTMSSSTTMAGAVRRPPSPTL
>PQ-12
MDAVVVVVAPSLGLVTANLLYLSPLRDVRARVAKGELADLAVIPLAMLAVNGFAWCVYSTVMTDVTILSA
FLVFFSNLPGALLCMYYGTAVLPLPDLSRRQLLGMRLVFAVGMSATLLGLLASQVACRDKCSPETRSSIL
GYVVIAIYMATTVSPLLSLVRVLKTRNAASFSAPLAATMLVNGALWAVFGFYIDNIVIWGPNAFSVLNSV
VQLVCLALLPSVPRQCTSVAGVYPDMPAPSAQGFH
>PQ-13
MDVVRTVGQVARRAGLLPGSCYSAVIEQRQWTDRRCLTIAASKLIGFALITFSTILKLPQ
IVKILQSGTAQGLSPAMYALECYAYIVNIAFAVRTGMPFSSFGEGVFILLQNIVILLLIW
TLSKGRRLSSLVAGSAALAGLAFALGADIVADSHLHLLRQTSPAVFCVAKLPQIVANFKN
RGTGQLSLITQGLQWLGNLARIGTTFGDPGAFSWIVLGDFVLAFVLNGVLTSQILYYGFA
RSKTTKKD
