# Supplementary material for: Sugar Transporters in Plasmodiophora brassicae: Genome-Wide Identification and Functional Verification
Source: Int J Mol Sci. 2022 May 9;23(9):5264. doi: 10.3390/ijms23095264 (PMC9099952; doi:10.3390/ijms23095264)
Supplement: Supplementary file 1 [file ijms-23-05264-s001.zip › sugar content.xlsx]

## Sheet: Sheet3
Fructose	repeat1	repeat2	repeat3
2W-Ck	331.76	408.36	370.06
2W-Pb	273.23	339.27	306.25
3W-Ck	255.14	292.71	273.925
3W-Pb	134.5	434.41	284.455
4W-Ck	488.81	549.28	396.25
4W-Pb	587.15	1041.93	616.53
5W-Ck	367.2	1376.49	871.845
5W-Pb	607.3	641.61	624.455
Glucose	repeat1	repeat2	repeat3
2W-Ck	1106.66	1973.24	1540
2W-Pb	1133.24	1627.11	1380.17
3W-Ck	1433.68	3079.64	2256.66
3W-Pb	675.38	1900.48	1287.93
4W-Ck	1847.09	2490.52	1536.89
4W-Pb	2057.77	2615.79	1402.69
5W-Ck	1466.71	2689.59	1302.75
5W-Pb	5633.22	4245.72	2850.79
Sucrose	repeat1	repeat2	repeat3
2W-Ck	1672.31	2749.78	2211.05
2W-Pb	2305.68	2469.46	2387.57
3W-Ck	2278.65	4293.83	3286.24
3W-Pb	2776.14	3544.25	3160.2
4W-Ck	4632.66	5139.62	3228.37
4W-Pb	2463.87	3369.52	3279.84
5W-Ck	2342.95	5715.92	1667.73
5W-Pb	2504.17	5042.5	817.87
